# Supplementary material
Source: PubMed Central journal article supplement (PMC4284099)
Supplement: NIHMS609597-supplement-supplement_1.pdf [file NIHMS609597-supplement-supplement_1.pdf]

(C), but decreased silencing of endogenous ORF YFR057W on VIR (D). Error bars indicate standard error of the mean. See also Supplemental Figure S6.

**Figure 6.** Sgf73 interacts with Sir2. (A), Interaction of recombinant Sir2-GST and Sgf73-GFP in the presence and absence of Sir2. Immunoprecipitation was done with glutathione beads coupled to either GST tagged Sir2, GST tagged enzymatically dead Sir2R319K, or GST, and western blot was probed with anti-GFP. (B), Interaction of endogenous Sir2 and Sgf73-GFP. Immunoprecipitation was done using anti-GFP antibody and western blots were probed using anti-Sir2 antibody.

#### SUPPORTING FIGURE LEGENDS

**Supplemental Figure S1.** Effect of *sus1Δ* and of combined *sgf73Δ* and *ubp8Δ* deletions on yeast RLS. (A), deletion of DUBm component *SUS1* does not extend RLS. (B), deletion of *UBP8* does not further extend RLS of *sgf73Δ*. Legends show (mean RLS, number of mother cells scored), related to Figure 1.

**Supplemental Figure S2.** Effect on yeast RLS of deletion of other non-essential components of SAGA. Legends show (mean RLS, number of mother cells scored), related to Figure 1.

**Supplemental Figure S3.** Deletion of *UBP10* does not increase RLS, and in fact decreases it. Legend shows (mean RLS, number of mother cells scored), related to Figure 1.

**Supplemental Figure S4.** *RTG1* (A) and *RTG3* (B) are not required for the extended RLS of *sgf73Δ*. Legends show (mean RLS, number of mother cells scored), related to Figure 3.

**Supplemental Figure S5.** *sgf73Δ* and *ubp8Δ* are much longer-lived than *fob1Δ* or *SIR2*-OE. Legend shows (mean RLS, number of mother cells scored), related to Figure 4.

**Supplemental Figure S6.** (A), The *sgf73Δ sir2Δ fob1Δ spt8Δ* strain is not long-lived, as is the case with *sgf73Δ sir2Δ fob1Δ*. (B), rDNA recombination remains high in double mutants lacking both *SGF73* and *SIR2*, related to Figure 5. Error bars represent standard error of the mean.

## REFERENCES

- Aparicio, O.M., Billington, B.L., and Gottschling, D.E. (1991). Modifiers of position effect are shared between telomeric and silent mating-type loci in *S. cerevisiae*. *Cell* 66, 1279-1287.
- Armour, S.M., Bennett, E.J., Braun, C.R., Zhang, X.Y., McMahon, S.B., Gygi, S.P., Harper, J.W., and Sinclair, D.A. (2013). A high-confidence interaction map identifies SIRT1 as a mediator of acetylation of USP22 and the SAGA coactivator complex. *Mol Cell Biol* 33, 1487-1502.
- Belotserkovskaya, R., Sterner, D.E., Deng, M., Sayre, M.H., Lieberman, P.M., and Berger, S.L. (2000). Inhibition of TATA-binding protein function by SAGA subunits Spt3 and Spt8 at Gcn4-activated promoters. *Mol Cell Biol* 20, 634-647.
- Cai, L., McCormick, M.A., Kennedy, B.K., and Tu, B.P. (2013). Integration of multiple nutrient cues and regulation of lifespan by ribosomal transcription factor ifh1. *Cell reports* 4, 1063-1071.
- Cai, L., Sutter, B.M., Li, B., and Tu, B.P. (2011). Acetyl-CoA induces cell growth and proliferation by promoting the acetylation of histones at growth genes. *Molecular cell* 42, 426-437.
- Dang, W., Steffen, K.K., Perry, R., Dorsey, J.A., Johnson, F.B., Shilatifard, A., Kaeberlein, M., Kennedy, B.K., and Berger, S.L. (2009). Histone H4 lysine 16 acetylation regulates cellular lifespan. *Nature* 459, 802-807.
- Daniel, J.A., Torok, M.S., Sun, Z.W., Schieltz, D., Allis, C.D., Yates, J.R., 3rd, and Grant, P.A. (2004). Deubiquitination of histone H2B by a yeast acetyltransferase complex regulates transcription. *The Journal of biological chemistry* 279, 1867-1871.
- David, G., Abbas, N., Stevanin, G., Durr, A., Yvert, G., Cancel, G., Weber, C., Imbert, G., Saudou, F., Antoniou, E., *et al.* (1997). Cloning of the SCA7 gene reveals a highly unstable CAG repeat expansion. *Nature genetics* 17, 65-70.

## Supplemental Figure S1

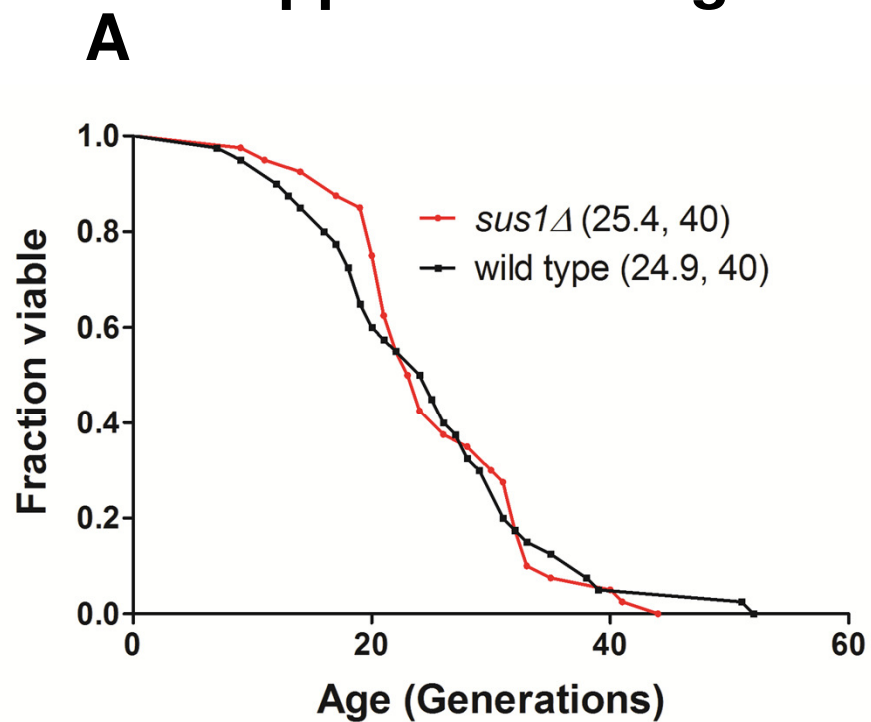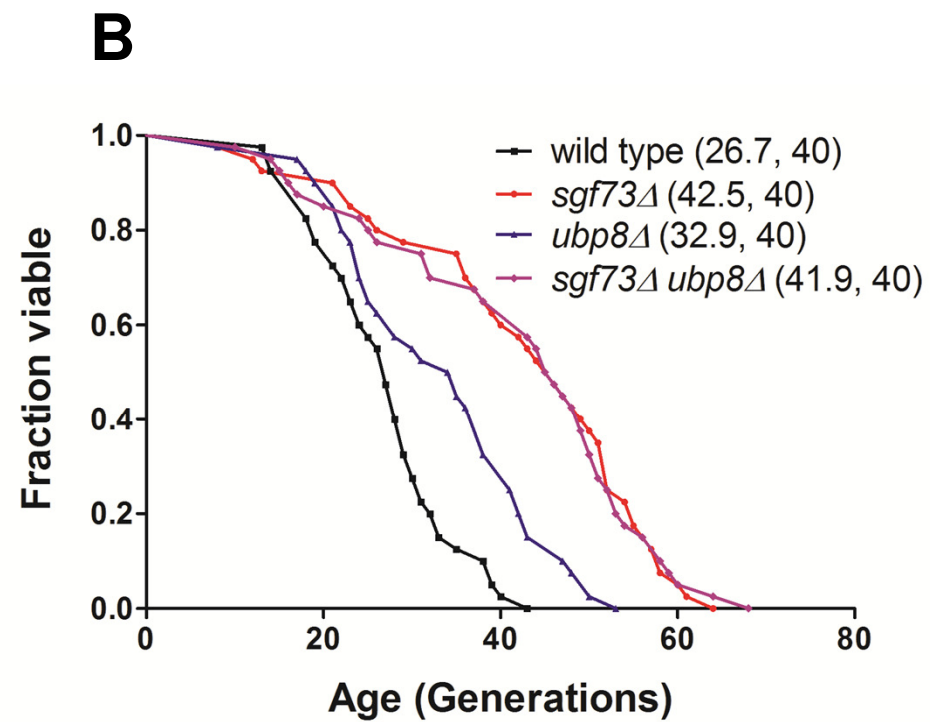

**Supplemental Figure S1.** Effect of *sus1* $\Delta$  and of combined *sgf73* $\Delta$  and *ubp8* $\Delta$  deletions on yeast RLS. (A), deletion of DUBm component *SUS1* does not extend RLS. (B), deletion of *UBP8* does not further extend RLS of *sgf73* $\Delta$ . Legends show (mean RLS, number of mother cells scored), related to Figure 1.

## Supplemental Figure S2

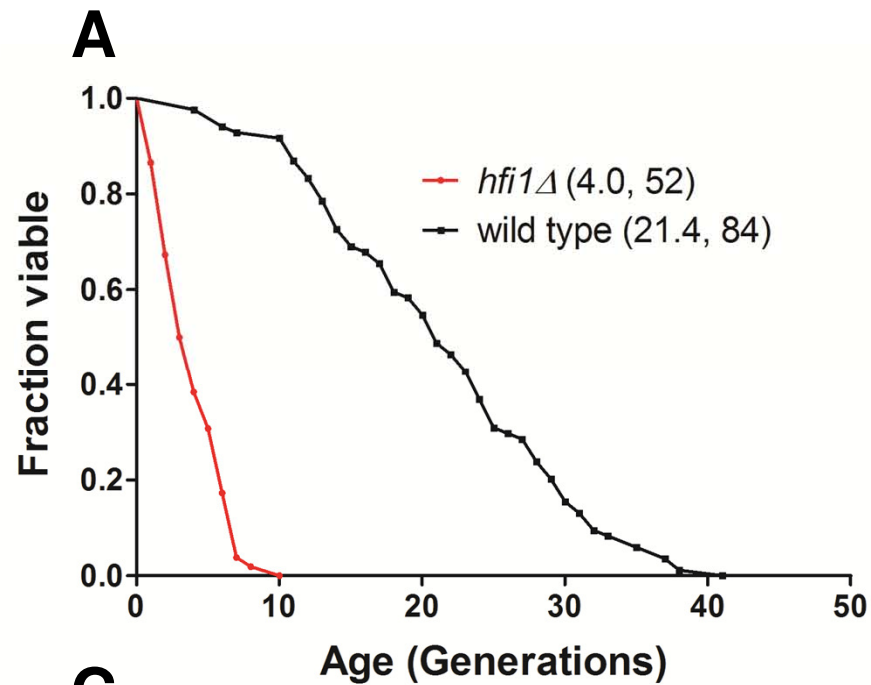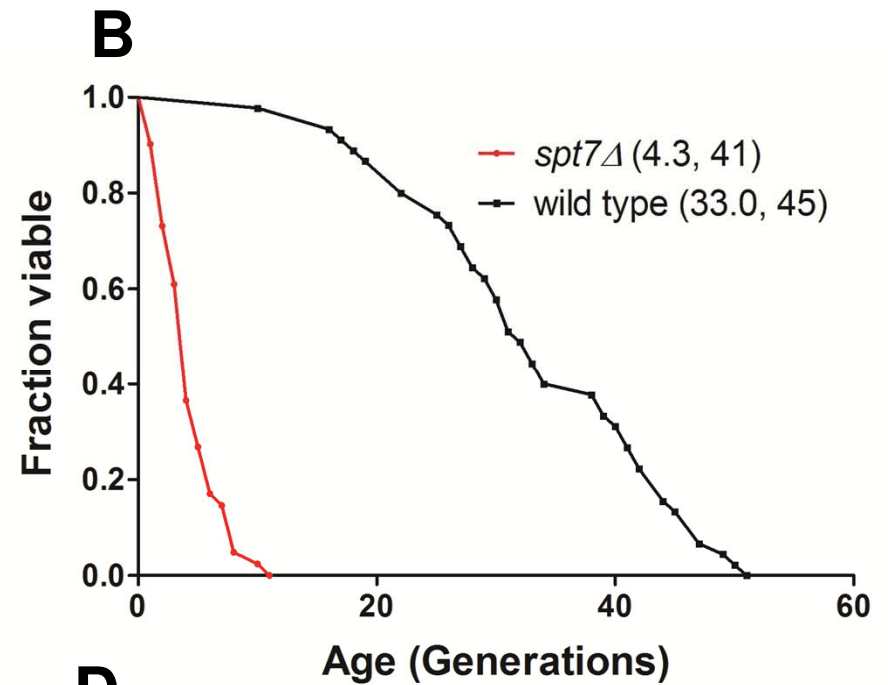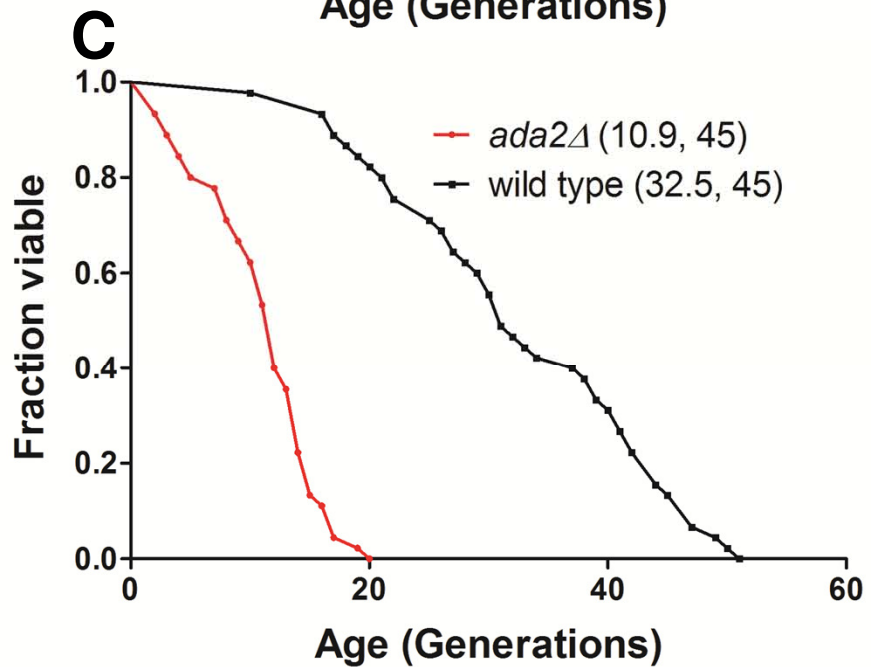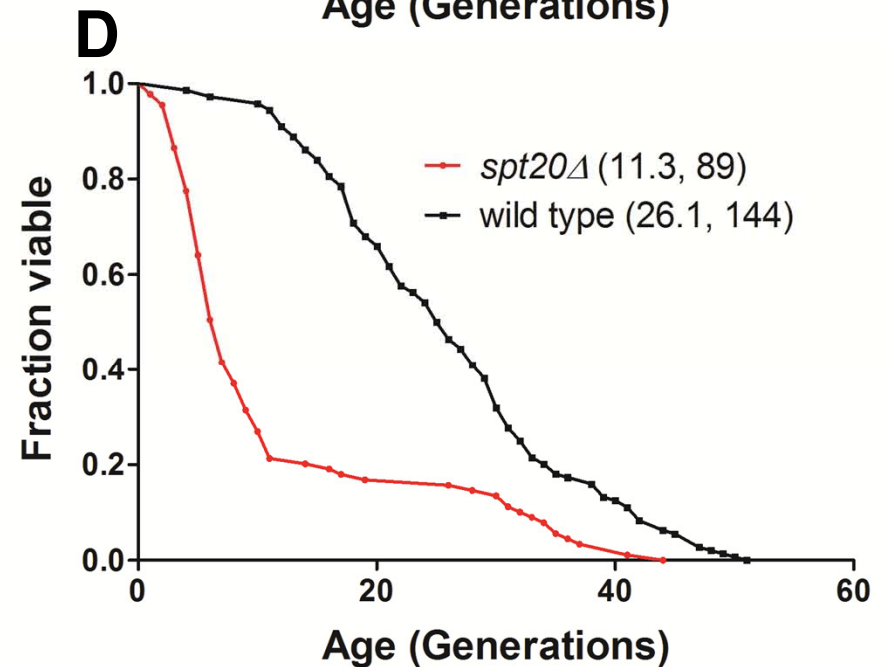

## Supplemental Figure S2 continued

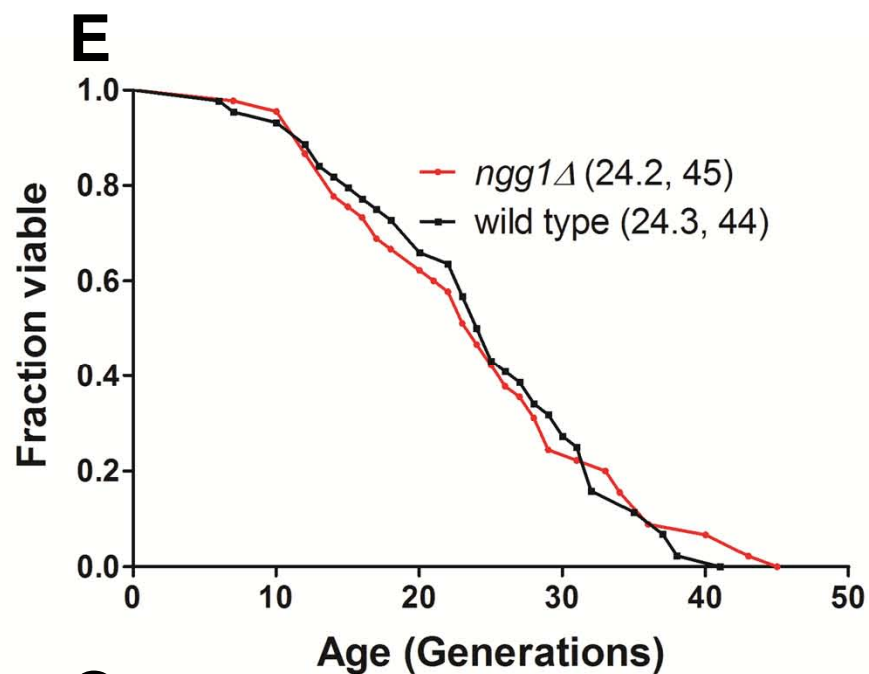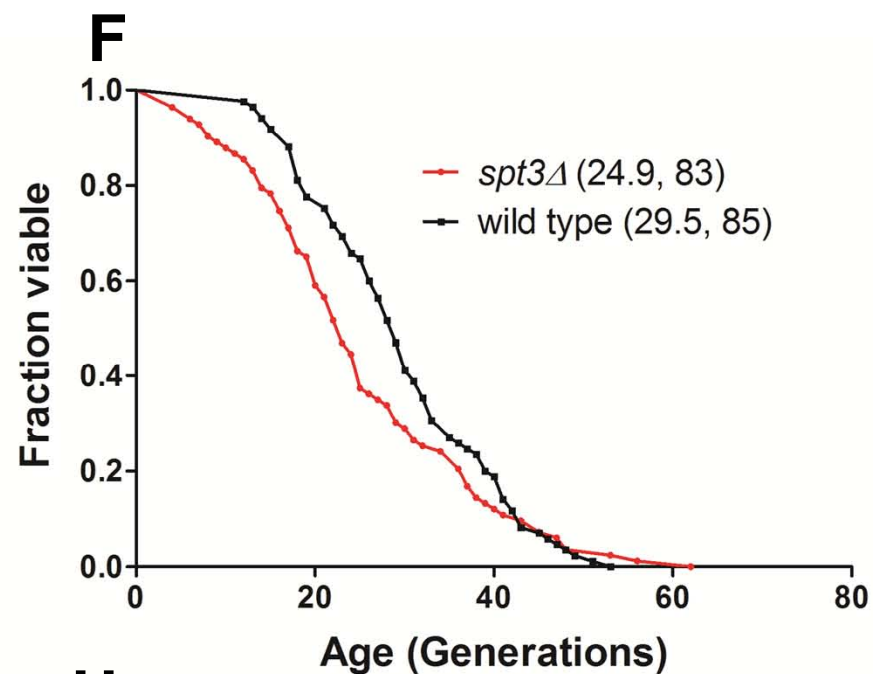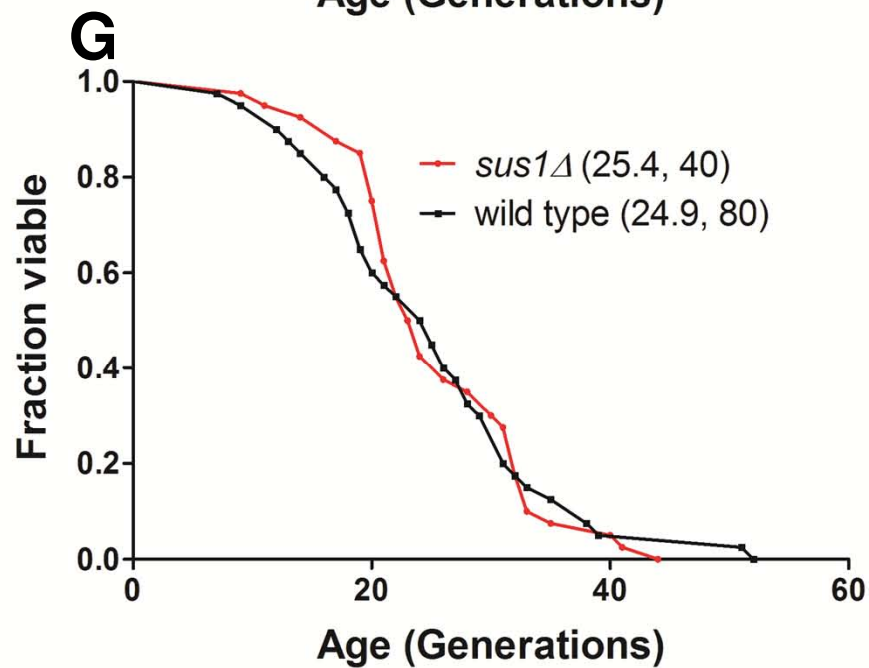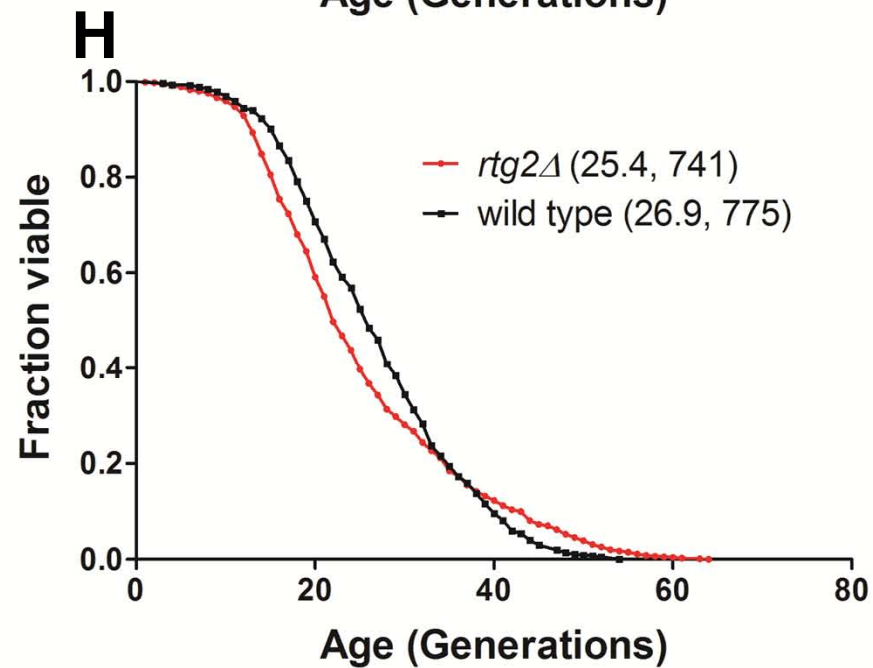

## Supplemental Figure S2 continued

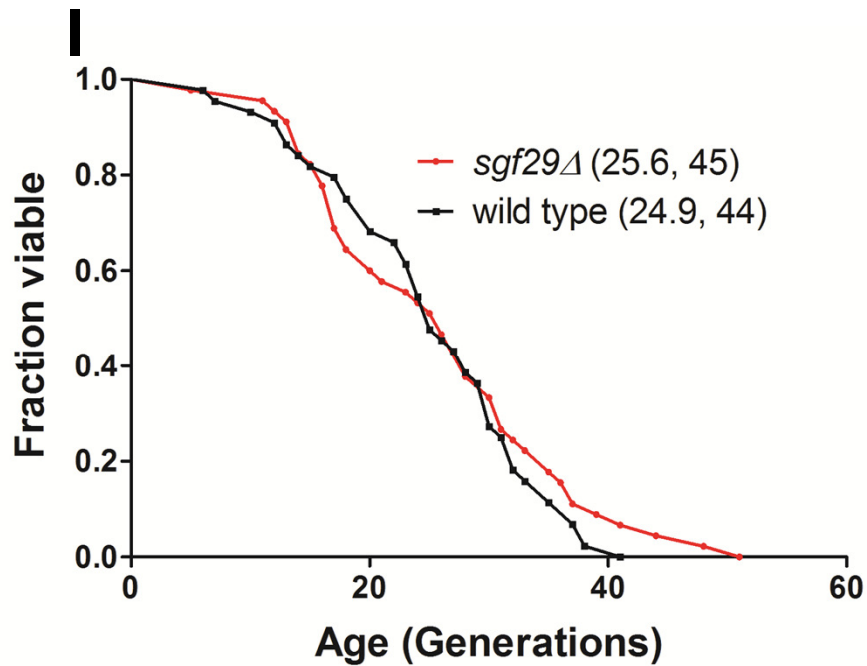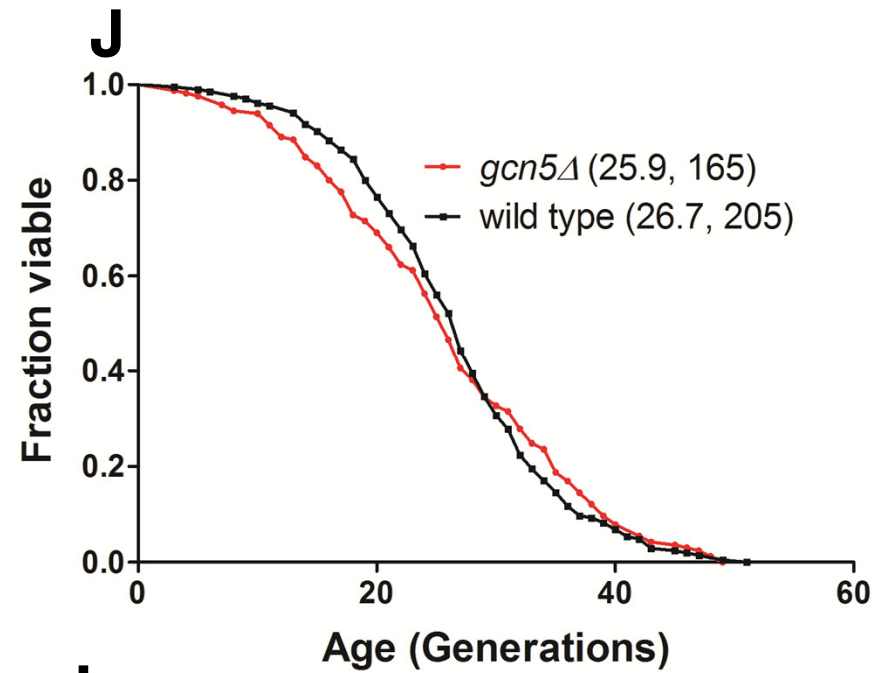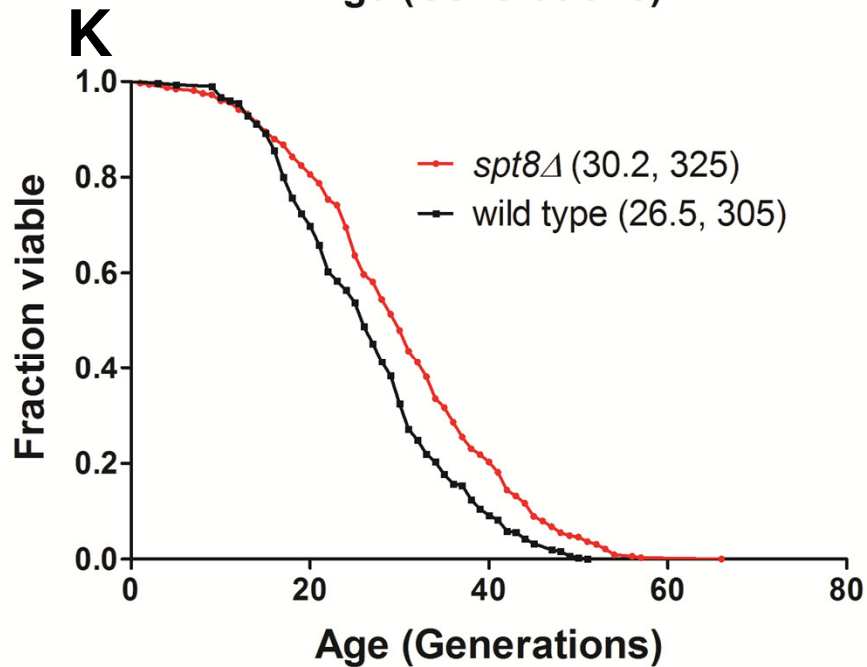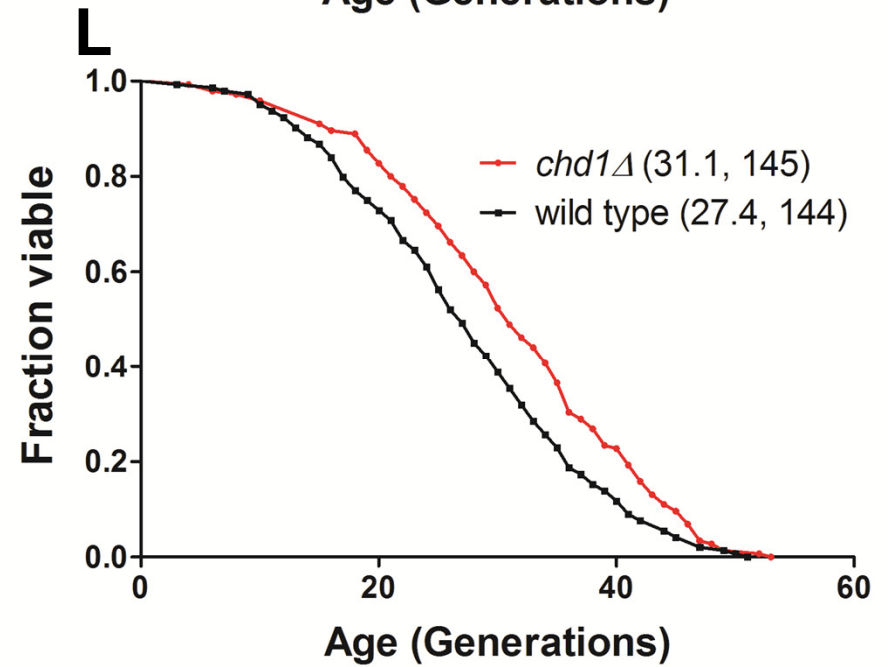

**Supplemental Figure S2.** Effect on yeast RLS of deletion of other non-essential components of SAGA. Legends show (mean RLS, number of mother cells scored), related to Figure 1.



# Supplemental Figure S3

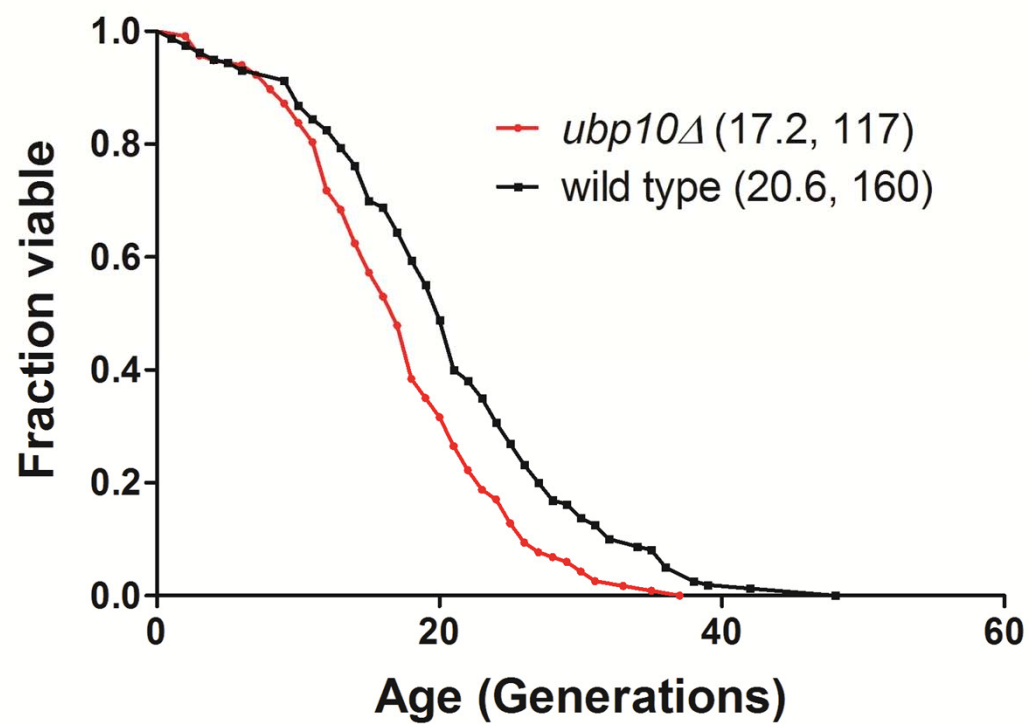

**Supplemental Figure S3.** Deletion of *UBP10* does not increase RLS, and in fact decreases it. Legend shows (mean RLS, number of mother cells scored), related to Figure 1.

## Supplemental Figure S4

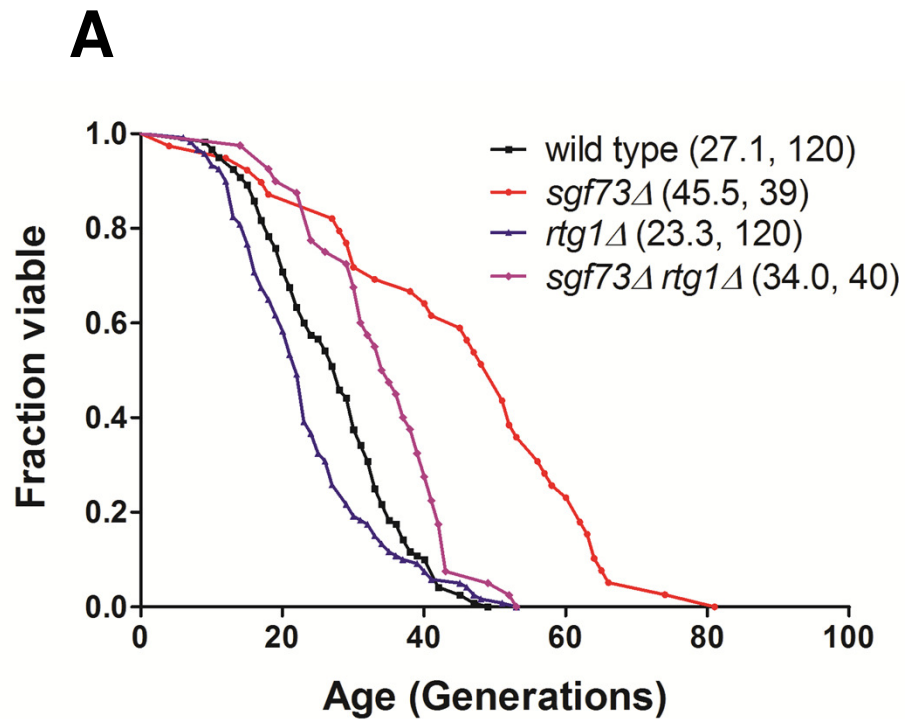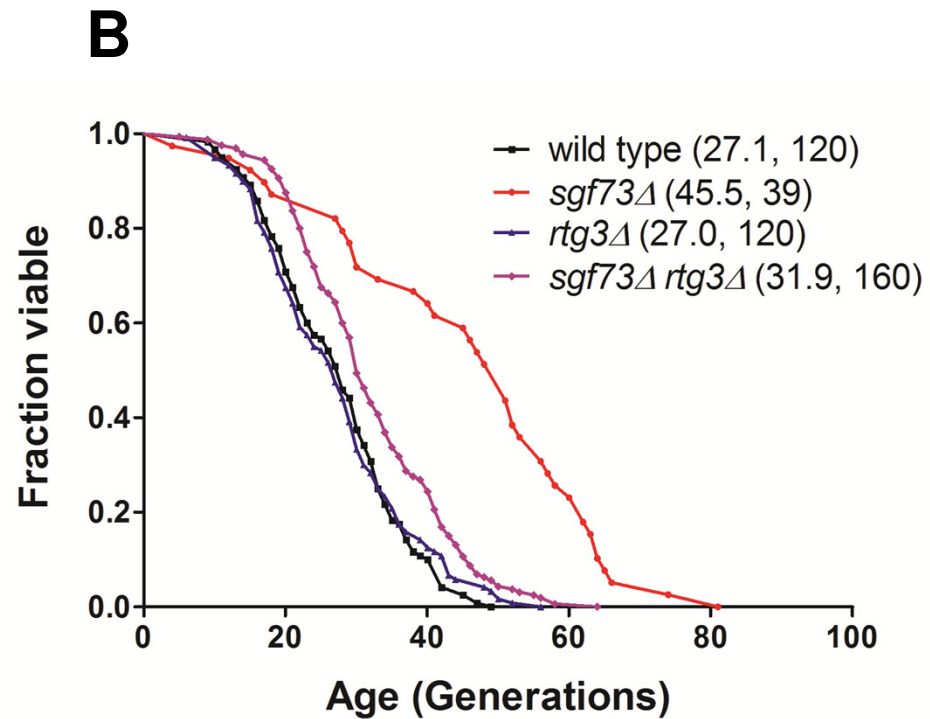

**Supplemental Figure S4.** *RTG1* (A) and *RTG3* (B) are not required for the extended RLS of *sgf73Δ*. Legends show (mean RLS, number of mother cells scored), related to Figure 3.

# Supplemental Figure S5

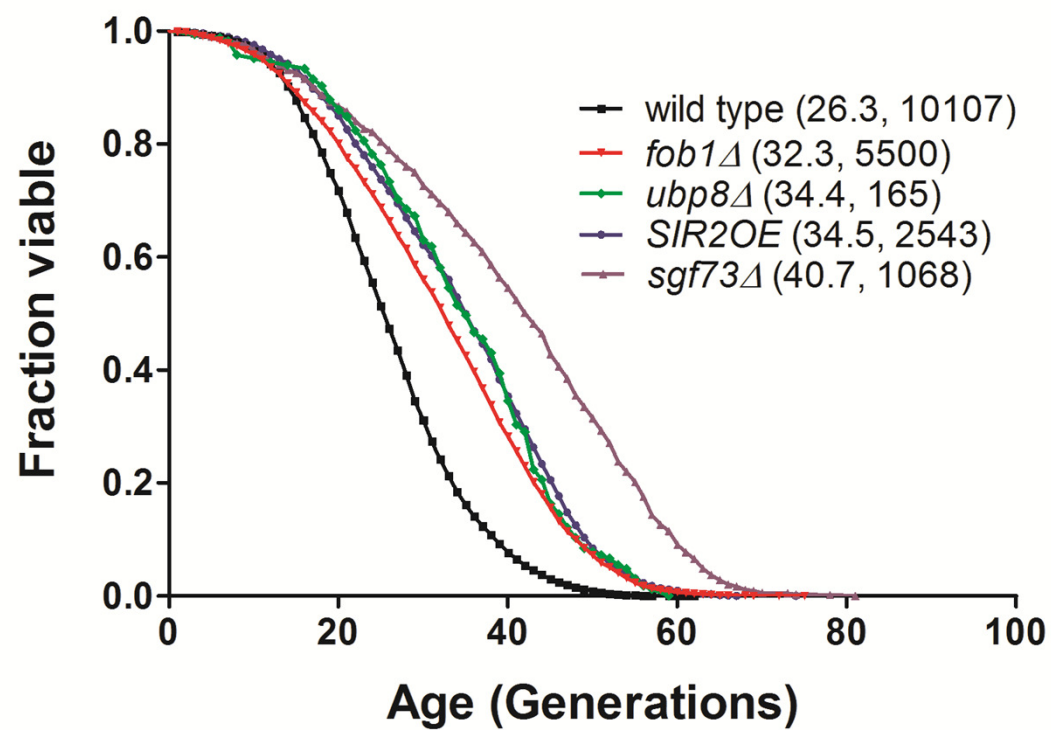

**Supplemental Figure S5.** *sgf73* $\Delta$  and *ubp8* $\Delta$  are much longer-lived than *fob1* $\Delta$  or *SIR2*-OE. Legend shows (mean RLS, number of mother cells scored), related to Figure 4.

## Supplemental Figure S6

A

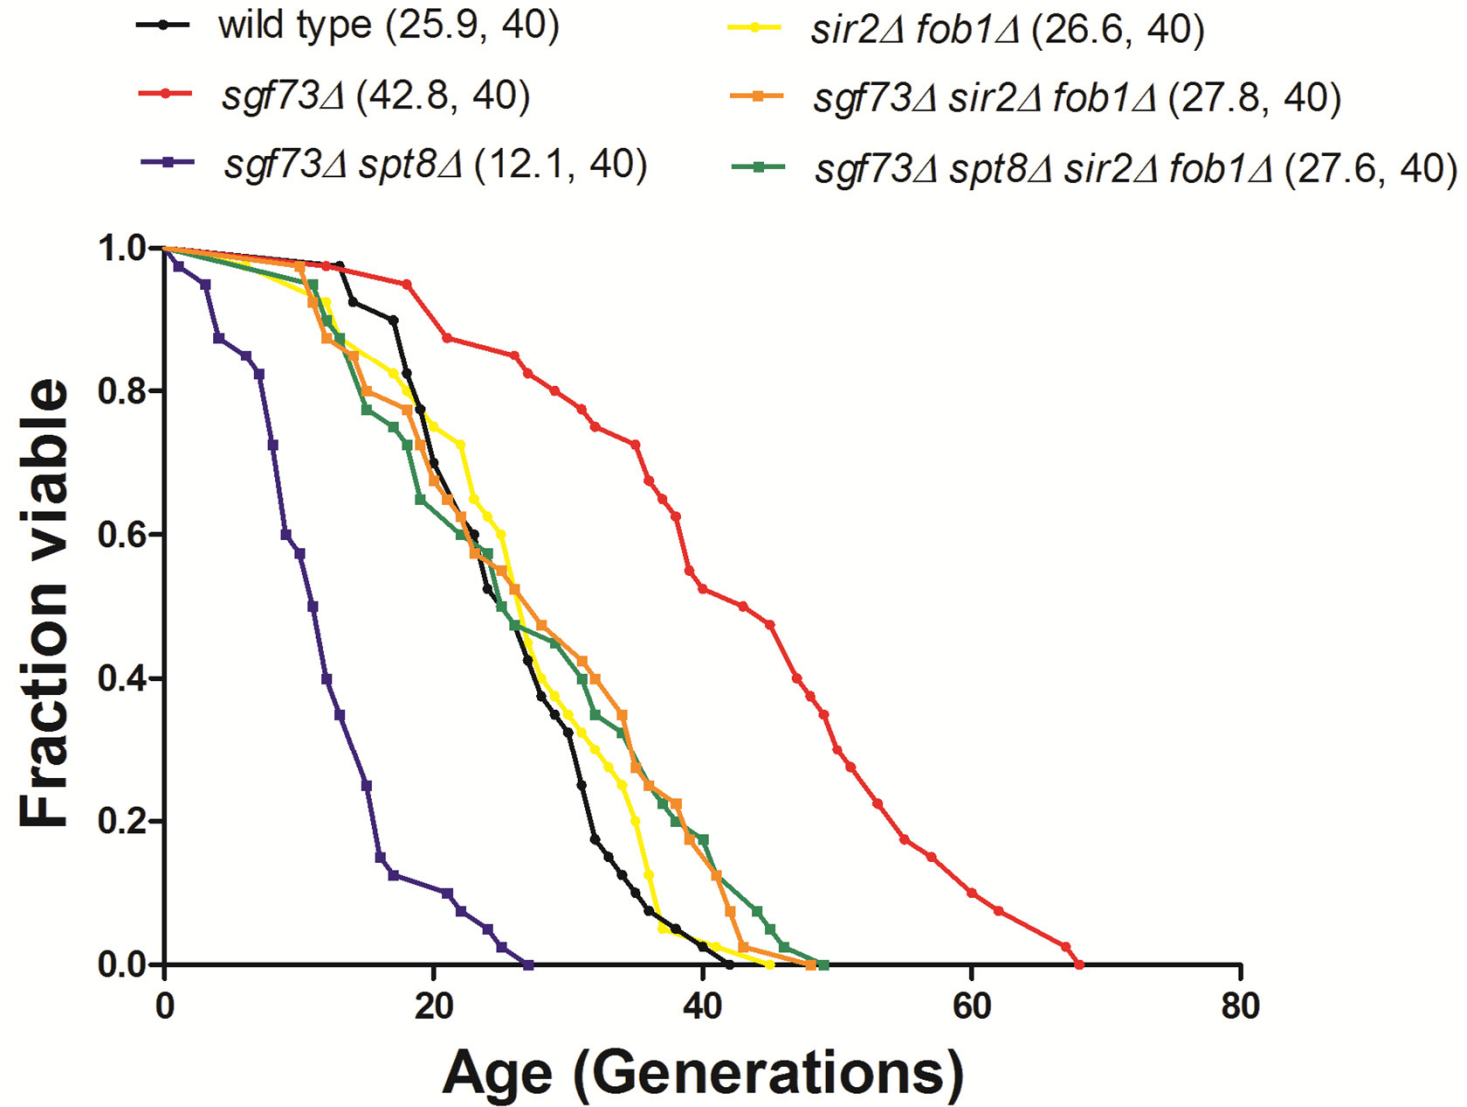

## Supplemental Figure S6, continued

B

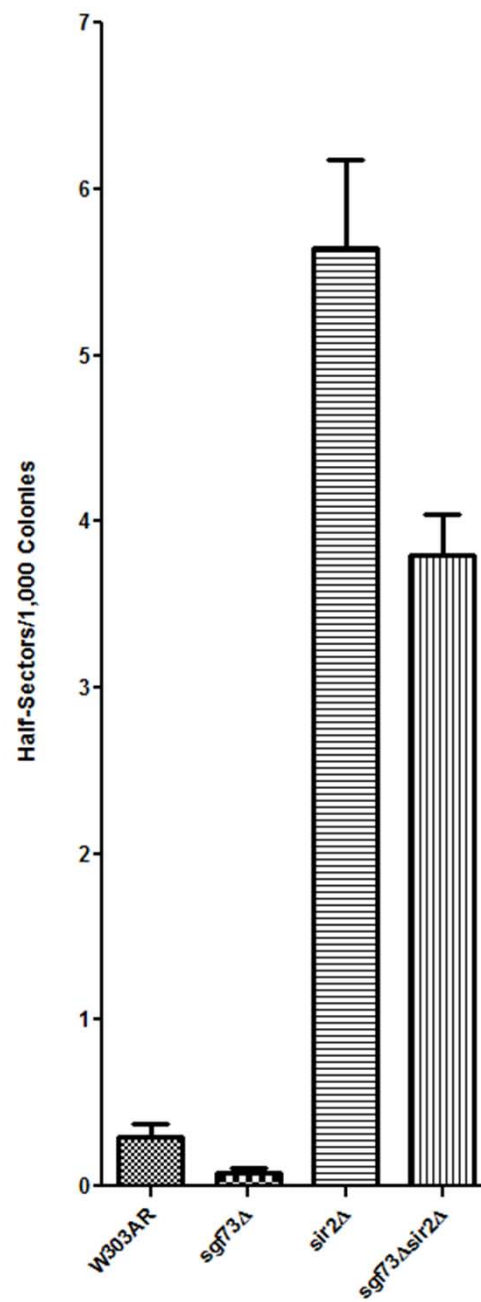



**Supplemental Figure S6.** (A), The *sgf73D sir2D fob1D spt8D* strain is not long-lived, as is the case with *sgf73D sir2D fob1D*. (B), rDNA recombination remains high in double mutants lacking both *SGF73* and *SIR2*, related to Figure 5.
